# Supplementary material
Source: PubMed Central journal article supplement (PMC2851634)
Supplement: NIHMS184989-supplement-Fig_S1_Legend.pdf [file NIHMS184989-supplement-Fig_S1_Legend.pdf]

**Role of Phosphatidylinositol(4,5)bisphosphate  
Organization in Membrane Transport  
by the Unc104 Kinesin Motor**

*Dieter R. Klopfenstein, Michio Tomishige,  
Nico Stuurman, and Ronald D. Vale  
Cell, Vol. 109, 347–358, May 3, 2002.*

**Figure S-1 Legend:**

Effects of Point Mutations in the PH Domain that Inhibits PtdIns(4,5)P<sub>2</sub> Binding on Liposome and Vesicle Transport
